# Supplementary material
Source: publisher site journal article supplement (https://www.dovepress.com/article/311994)
Supplement: Supplementary file 1 [file get_supplementary_file.php]

**[Supplementary](javascript:;) table 1. Inflammation-based prognostic score systems**

| **Scoring systems** | **Score** |
| --- | --- |
| **The Glasgow Prognostic Score (GPS)** |  |
| CRP (≤10 mg/L) and albumin (≥35 g/L) | 0 |
| CRP (≤10 mg/L) and albumin (<35 g/L) | 1 |
| CRP (>10 mg/L) and albumin (≥35 g/L) | 1 |
| CRP (>10 mg/L) and albumin (<35 g/L) | 2 |
| **The** **modified Glasgow Prognostic Score (Modified GPS)** |  |
| CRP (≤10 mg/L) and albumin (≥35 g/L) | 0 |
| CRP (≤10 mg/L) and albumin (<35 g/L) | 0 |
| CRP (>10 mg/L) and albumin (≥35 g/L) | 1 |
| CRP (>10 mg/L) and albumin (<35 g/L) | 2 |
| **Neutrophil lymphocyte ratio (NLR)** |  |
| Neutrophil count: lymphocyte count ≤5:1 | 0 |
| Neutrophil count: lymphocyte count >5:1 | 1 |
| **Platelet lymphocyte ratio (PLR)** |  |
| Platelet count: lymphocyte count <150:1 | 0 |
| Platelet count: lymphocyte count ≥150:1 | 1 |
| Platelet count: lymphocyte count >300:1 | 2 |
| **Prognostic Nutritional Index (PNI)** |  |
| Albumin (g/L) +5×total lymphocyte count (109/L) >45 | 0 |
| Albumin (g/L) +5×total lymphocyte count (109/L) ≤45 | 1 |
| **Prognostic index (PI)** |  |
| C-reactive protein≤10 mg/l and white cell count≤11×109/L | 0 |
| C-reactive protein≤10 mg/l and white cell count >11×109/L | 1 |
| C-reactive protein>10 mg/l and white cell count≤11×109/L | 1 |
| C-reactive protein>10 mg/l and white cell count>11×109/L | 2 |
| **Lymphocyte-C-reactive Protein ratio (LCR)** |  |
| 104×lymphocyte count (109/L): CRP (mg/L) >6000 | 0 |
| 104×lymphocyte count (109/L): CRP (mg/L) ≤6000 | 1 |

Aberration：CRP: C-reactive protein

[**Supplementary**](javascript:;)**table 2.** **Surgery-related characteristics and postoperative outcome**

| **Variables** | **Primary cohort** | **Validation cohort** |
| --- | --- | --- |
| （n=716） | （n=442）） |
| Child-Pugh class |  |  |
| A | 666 (92.0) | 415 (89.1) |
| B | 57 (8.0) | 48 (10.9) |
| Surgical approach* |  |  |
| Open procedure | 412(77.3) | 196 (62.2) |
| Laparoscopic procedure | 121 (22.7) | 119 (37.8) |
| Type of hepatectomy* |  |  |
| Minor hepatectomy | 337 (63.2) | 189 (60.0) |
| Major hepatectomy | 196 (36.8) | 126 (40.0) |
| Surgical margin* |  |  |
| R0 | 501 (94.0) | 292 (92.7) |
| R1 | 32 (6.0) | 23 (7.3) |

*In the primary cohort, 533 patients underwent hepatic resection, and 183 patients underwent RFA. In the validation cohort, 315 patients underwent hepatic resection, and 127 patients underwent RFA.

[**Supplementary**](javascript:;)**table 3.** The correlation between LCR and prognostic factors in the primary and validation cohorts

| **Variables** | **Primary cohort (n=716)** | | **Validation cohort (n=442)** | |
| --- | --- | --- | --- | --- |
| LCR=0 (n=409) | LCR=1 (n=307) | LCR=0  (n=226) | LCR=1  (n=216) |
| Recurrence | 254 (62.1) | 236 (76.9) | 124 (54.9) | 151 (69.9) |
| early recurrence | 165 (40.3) | 204 (66.4) | 82 (36.3) | 123 (56.9) |
| late recurrence | 89 (21.8) | 32 (10.5) | 42 (18.6) | 28 (13.0) |
| α-fetoprotein, ng/ml |  |  |  |  |
| ≤200 | 217 (53.1) | 145 (47.2) | 118 (52.2) | 104 (48.1) |
| >200 | 192 (46.9) | 162 (52.8) | 108 (47.8) | 112 (51.9) |
| Tumor size, cm |  |  |  |  |
| ≤5 | 257 (62.8) | 74 (24.1) | 152 (67.3) | 74 (34.3) |
| >5 | 152 (37.2) | 233 (75.9) | 52 (32.7) | 164 (65.7) |
| Tumour number |  |  |  |  |
| Solitary | 336 (82.2) | 222 (72.3) | 184 (81.4) | 174 (80.6) |
| Multiple | 73 (17.8) | 85 (27.7) | 42 (18.6) | 42 (19.4) |
| Macrovascular invasion |  |  |  |  |
| Yes | 27 (6.6) | 64 (20.8) | 15 (6.6) | 35 (16.2) |
| No | 382 (93.4) | 243 (79.2) | 211 (93.4) | 181 (93.8) |

[**Supplementary**](javascript:;)**Figure 1.**


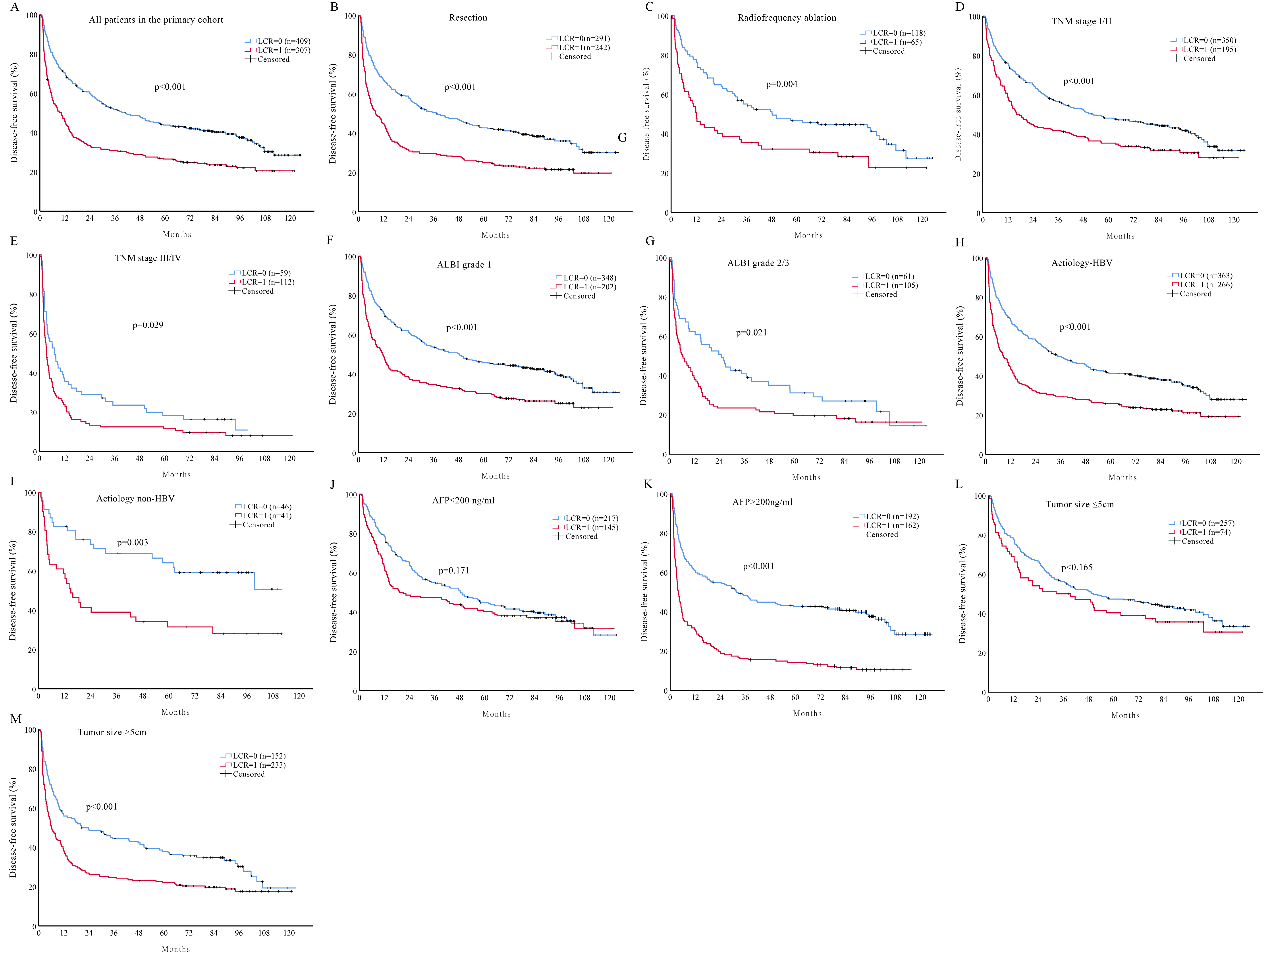


[Supplementary](javascript:;) Figure 1:The prognostic significance of the LCR score in HCC patients with different disease states in the primary cohort: (A) all patients, (B) resection, (C) radiofrequency ablation, (D),TNM stage I/II, (E) TNM stage III/IV, (F) ALBI grade I, (G) ALBI grade II/III, (H) aetiology-HBV, (I) aetiology-non-HBV, (J) AFP≤200 ng/ml, (K) AFP>200 ng/ml, (L) tumour size≤5 cm, and (M) tumour size>5 cm.

[**Supplementary**](javascript:;)**Figure 2.**


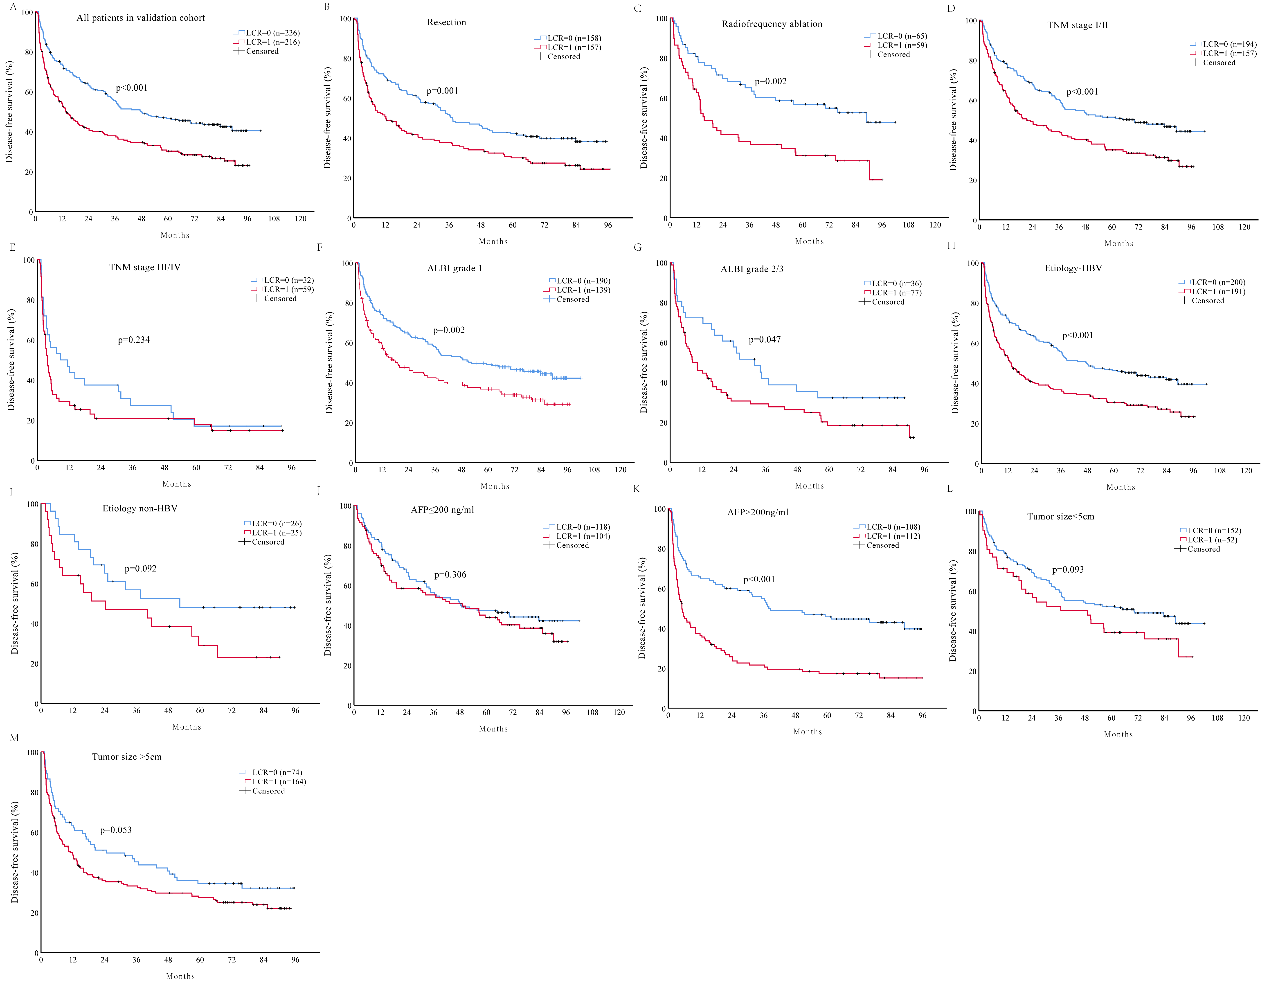


[Supplementary](javascript:;) Figure 2:The prognostic significance of the LCR score in HCC patients with different disease states in the validation cohort: (A) all patients, (B) resection, (C) radiofrequency ablation, (D),TNM stage I/II, (E) TNM stage III/IV, (F) ALBI grade I, (G) ALBI grade II/III, (H) aetiology-HBV, (I) aetiology-non-HBV, (J) AFP≤200 ng/ml, (K) AFP>200 ng/ml, (L) tumour size≤5 cm, and (M) tumour size>5 cm.
